# Supplementary material
Source: PubMed Central journal article supplement (PMC4801481)

**Table S1:** Thermodynamics of non-specific binding of Rev-ARM to stems IA and IIB at 0.1 M KCl

| Temperature (K) | RNA | $K_d$ ( $\mu\text{M}$ ) | $\Delta G$ ( $\text{kcal mol}^{-1}$ ) | $\Delta H$ ( $\text{kcal mol}^{-1}$ ) | $T\Delta S$ ( $\text{kcal mol}^{-1}$ ) | n (number of lattice sites occluded) |
|-----------------|-----|-------------------------|---------------------------------------|---------------------------------------|----------------------------------------|--------------------------------------|
| 283             | IA  | $0.81 \pm 0.19$         | $-7.90 \pm 0.13$                      | $-8.52 \pm 1.01$                      | $-0.62 \pm 1.02$                       | $9.8 \pm 0.55$                       |
| 293             |     | $2.27 \pm 0.27$         | $-7.57 \pm 0.06$                      | $-10.0 \pm 0.82$                      | $-2.48 \pm 0.82$                       | $7.2 \pm 1.01$                       |
| 303             |     | $3.17 \pm 1.67$         | $-7.54 \pm 0.19$                      | $-9.93 \pm 0.73$                      | $-2.40 \pm 0.76$                       | $6.9 \pm 0.17$                       |
| 283             | IIB | $0.51 \pm 0.01$         | $-8.15 \pm 0.01$                      | $-7.40 \pm 0.46$                      | $0.75 \pm 0.46$                        | $9.2 \pm 1.1$                        |
| 293             |     | $0.70 \pm 0.29$         | $-8.28 \pm 0.22$                      | $-9.18 \pm 0.59$                      | $-0.89 \pm 0.63$                       | $9.2 \pm 0.44$                       |
| 303             |     | $0.87 \pm 0.75$         | $-8.52 \pm 0.36$                      | $-9.18 \pm 0.47$                      | $-0.65 \pm 0.59$                       | $10.0 \pm 0.18$                      |

### **Supporting Information Figure Legends**

**Figure S1:** Selected regions from 1-1-echo  $^1\text{H}$  NMR spectra for free, peptide-bound and protein-bound IA and IIB RNA samples

**Figure S2: Reverse titration profiles at 0.2 M KCl show weakened non-specific binding**

(A, B) ITC traces for the titration of IIB (A) or IA (B) into Rev-ARM in buffer containing 0.2 M KCl. (C, D) Integrated heats for the above traces.

Figure S1

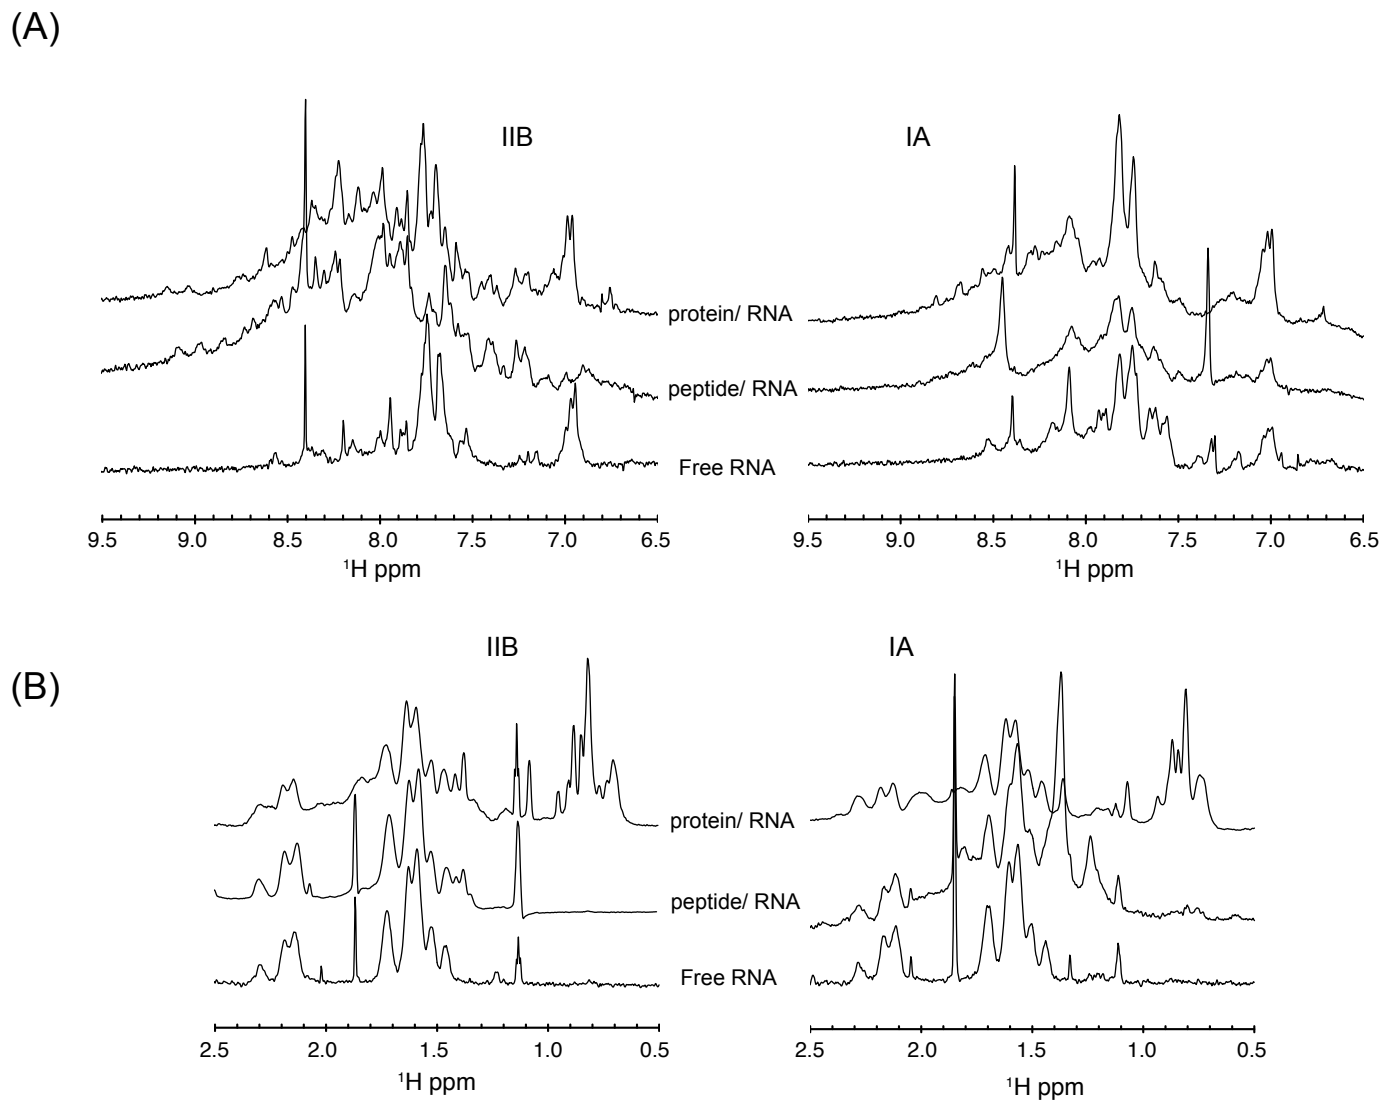

Figure S2

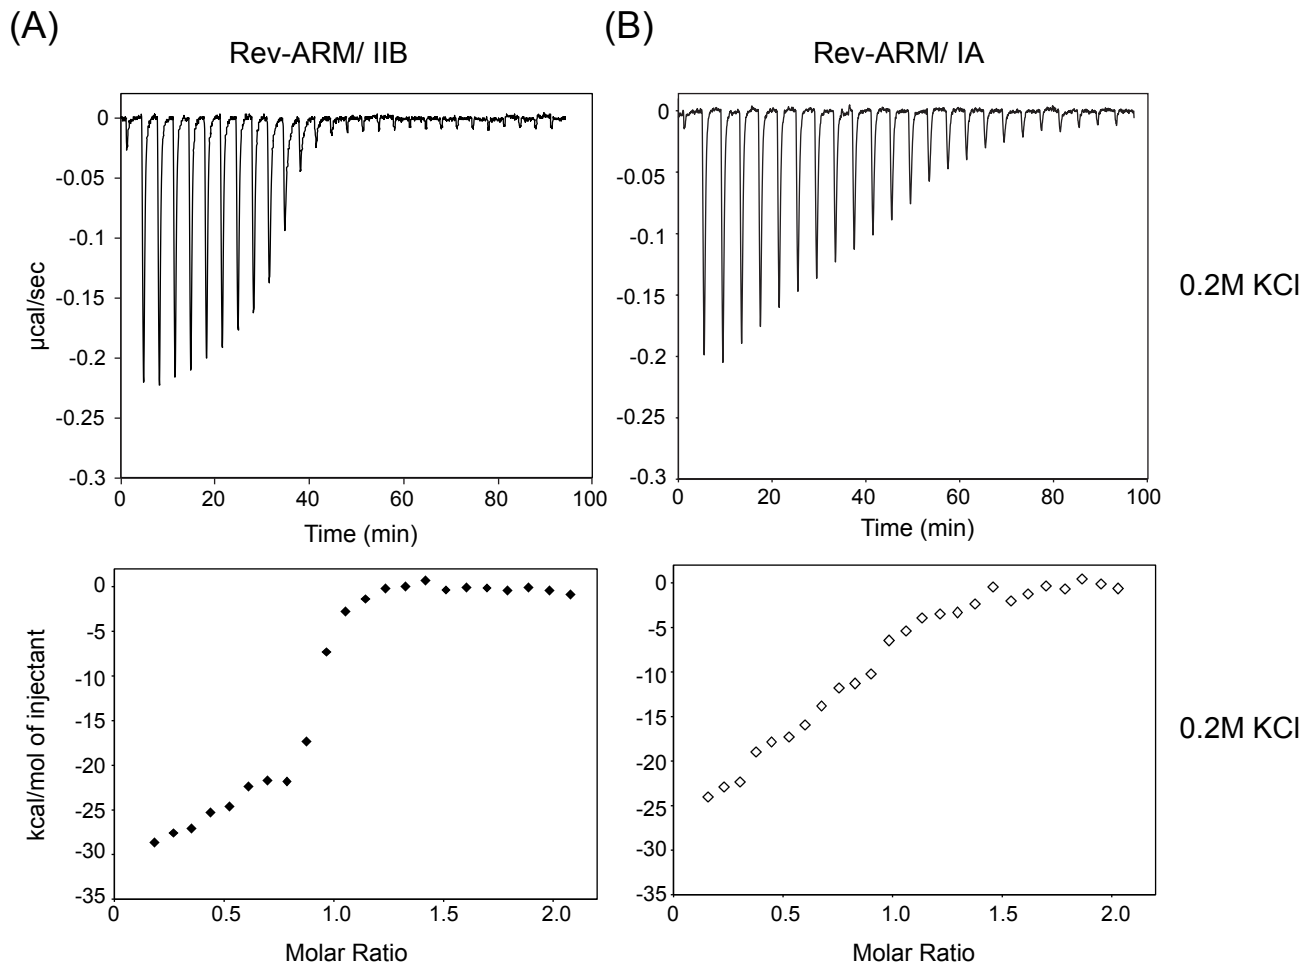

Supplement: NIHMS766607-supplement-supporting_information.pdf [file NIHMS766607-supplement-supporting_information.pdf]
